# Supplementary material for: Regular Supplementation with Antioxidants Rescues Doxorubicin-Induced Bone Deformities and Mineralization Delay in Zebrafish
Source: MDPI journal article supplement (doi:10.3390/nu14234959), 2022-11-23
Supplement: s1 [file s1]

# Supplementary Materials

## Regular Supplementation with Antioxidants Rescues Doxorubicin-Induced Bone Deformities and Mineralization Delay in Zebrafish

Sunil Poudel <sup>1,2,3</sup>, Gil Martins <sup>1,2,3</sup>, M. Leonor Cancela <sup>1,2,4</sup>  
and Paulo J. Gavaia <sup>1,2,\*</sup>

<sup>1</sup> Centre of Marine Sciences, University of Algarve, 8005-139 Faro, Portugal

<sup>2</sup> Faculty of Medicine and Biomedical Sciences (FMCB), University of Algarve, 8005-139 Faro, Portugal

<sup>3</sup> PhD Program in Biomedical Sciences, Faculty of Medicine and Biomedical Sciences (FMCB), University of Algarve, 8005-139 Faro, Portugal

<sup>4</sup> Algarve Biomedical Center, University of Algarve, 8005-139 Faro, Portugal

\* Correspondence: pgavaia@ualg.pt; Tel.: +351-289-800-900 or +351-289-800-057 (ext. 7057); Fax: +351-289-800-069

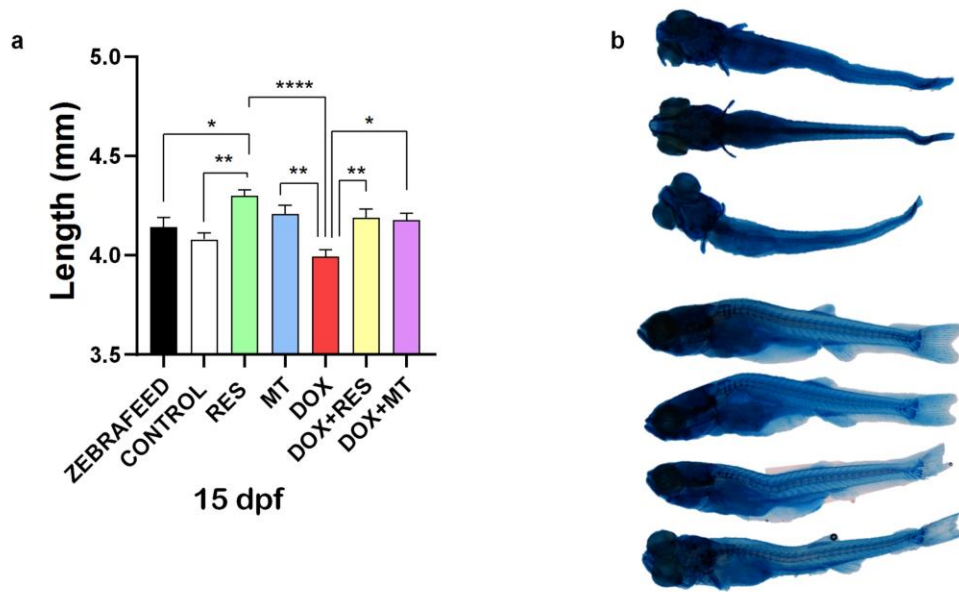

**Figure S1:** Comparison of the microdiets prepared with commercially available zebrafish fed (ZEBRAFEED) (a), Some of the skeletal deformities observed during the trial (b). Levels of significance were calculated using Tukey's multiple comparisons (one-way ANOVA) [ $* p \leq 0.05$ ,  $** p \leq 0.01$ ,  $*** p \leq 0.001$ ,  $**** p \leq 0.0001$ ].
